# Supplementary material for: Recovery of cobalt as CoS from spent Li-ion batteries and investigation of its use as an electrode material for supercapacitors
Source: Royal Society of Chemistry journal article supplement (doi:10.1039/d3nj00380a), 2023-01-01
Supplement: d3nj00380a1.pdf [file d3nj00380a1.pdf]

**Recovery of Cobalt as CoS from Spent Li-ion Batteries and Investigation of Its Use  
as Electrode Material of Supercapacitor**

Sezgin YASA<sup>1,2</sup>, Burak BİROL<sup>1</sup>, Metin GENÇTEN<sup>1\*</sup>

<sup>1</sup> Yildiz Technical University, Faculty of Chemical and Metallurgical Engineering, Department of Metallurgy and Materials Engineering, 34210 Istanbul, Turkey

<sup>2</sup> Cankırı Karatekin University, Faculty of Engineering, Department of Mechanical Engineering, Cankırı, Turkey

**(Supplementary Document)**

**\*Corresponding author:** Assoc. Prof. Dr. Metin GENÇTEN  
Department of Metallurgy and Materials Engineering,  
Faculty of Chemical and Metallurgical Engineering,  
Yildiz Technical University, 34210 Istanbul, Turkey  
E-mail: [mgencten27@gmail.com](mailto:mgencten27@gmail.com)

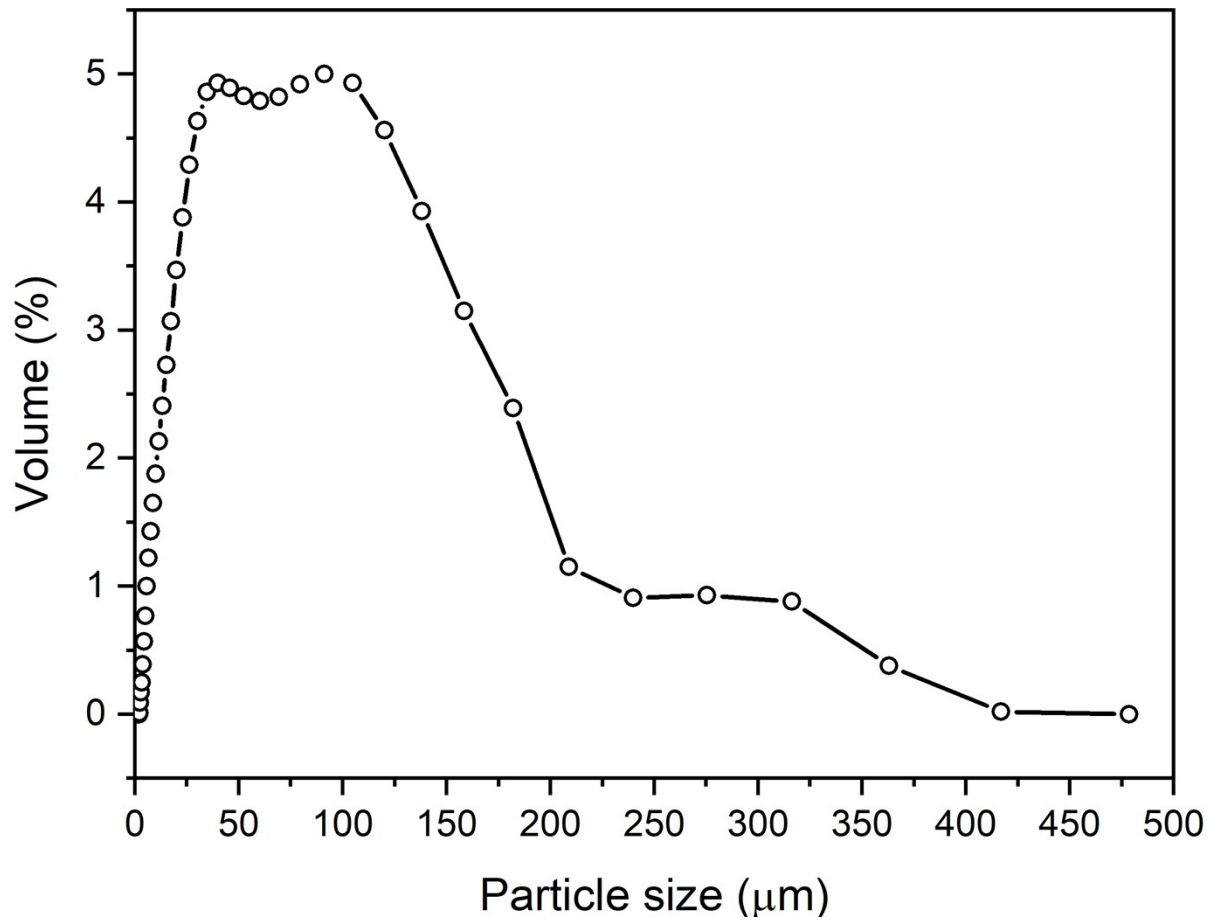

**Figure S1.** Grain size distribution of ground CoS powder

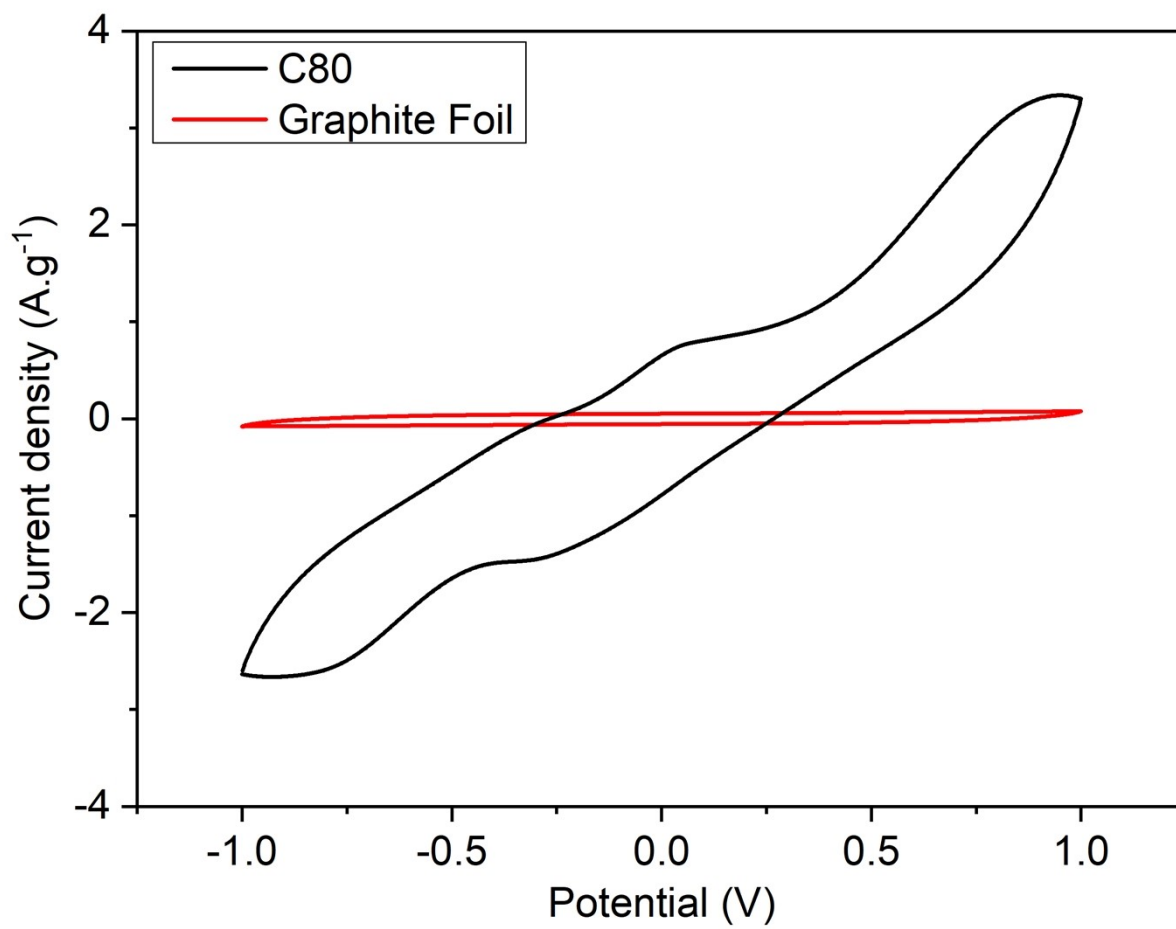

**Figure S2** Comparison of cyclic voltammograms of C80 and graphite foil including supercapacitors at  $50 \text{ mV s}^{-1}$ .

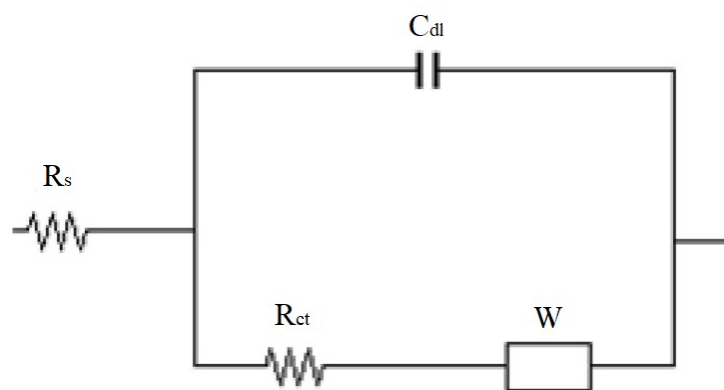

**Figure S3** Used equivalent circuit model for fitting of EIS spectra
